# Supplementary material
Source: PubMed Central journal article supplement (PMC4919227)
Supplement: NIHMS767314-supplement-supplementary_materials.pdf [file NIHMS767314-supplement-supplementary_materials.pdf]

**SUPPLEMENT TO**

**Attention-Deficit/Hyperactivity Disorder Symptoms in a Non-referred Low Birthweight/Preterm Cohort:**

**Longitudinal Profiles, Outcomes and Associated Features**

Krasner AJ, Turner JB, Feldman JF, Silberman AE,

Fisher PW, Workman CC, Posner JE, Greenhill LL,

Lorenz JM, Shaffer D, Whitaker AH

**Corresponding author:** Agnes H. Whitaker, M.D., New York State Psychiatric Institute, 1051 Riverside Drive, Unit 74, New York, New York 10032; telephone number 646-774-5757; fax number 646-774-5808; email address [whitakea@nyspi.columbia.edu](mailto:whitakea@nyspi.columbia.edu).

**Supplement Table 1: Background Characteristics of the Study Sample and two Comparison Samples<sup>a</sup>**

| Risk Factors                                     | Comparison Samples             |                              |                                | $\chi^2 / F$ | P      |
|--------------------------------------------------|--------------------------------|------------------------------|--------------------------------|--------------|--------|
|                                                  | Study Sample <sup>b</sup>      | Missing 1 or 2<br>DISC       | Missing all 3<br>DISC          |              |        |
|                                                  |                                | Assessments <sup>c</sup>     | Assessments <sup>d</sup>       |              |        |
|                                                  | % (n/N)<br>M (SD)<br>(N = 387) | % (n/N)<br>M (SD)<br>(N=190) | % (n/N)<br>M (SD)<br>(N = 237) |              |        |
| <b>Basic Characteristics</b>                     |                                |                              |                                |              |        |
| Maternal Social Risk <sup>e</sup>                | 38.2 (148/387)                 | 61.9 (117/189)               | 58.9 (139/236)                 | 39.57        | <0.001 |
| Male Gender                                      | 51.7 (200/387)                 | 50.5 (96/190)                | 48.9 (116/237)                 | 0.44         | 0.802  |
| Birth weight                                     |                                |                              |                                | 1.77         | 0.777  |
| 1500+ g                                          | 54.3 (210/387)                 | 57.9 (110/190)               | 52.3 (124/237)                 |              |        |
| 1000 – 1499 g                                    | 34.6 (134/387)                 | 32.6 (62/190)                | 35.0 (83/237)                  |              |        |
| < 1000 g (%)                                     | 11.1 (43/387)                  | 9.5 (18/190)                 | 12.7 (30/237)                  |              |        |
| Gestational Age                                  |                                |                              |                                | 5.24         | 0.514  |
| > 36 weeks                                       | 4.1 (16/387)                   | 5.3 (10/190)                 | 6.3 (15/237)                   |              |        |
| 34 – 36 weeks                                    | 23.0 (89/387)                  | 25.8 (49/190)                | 19.8 (47/237)                  |              |        |
| 32 – 33 weeks                                    | 26.6 (103/387)                 | 29.5 (56/190)                | 26.6 (63/237)                  |              |        |
| < 32 weeks                                       | 46.3 (179/387)                 | 39.5 (75/190)                | 47.3 (112/237)                 |              |        |
| Small (low weight) for Gestational Age (SGA)     | 30.5 (118/387)                 | 35.3 (67/190)                | 35.9 (85/237)                  | 2.41         | 0.300  |
| <b>US Abnormalities</b>                          |                                |                              |                                |              |        |
| No Abnormality                                   | 81.7 (316/387)                 | 83.7 (159/190)               | 79.3 (188/237)                 | 1.48         | 0.831  |
| Germinal Matrix / Intraventricular Hemorrhage    | 14.2 (55/387)                  | 13.2 (25/190)                | 16.0 (38/237)                  |              |        |
| Parenchymal Lesion / Ventricular Enlargement     | 4.1 (16/387)                   | 3.2 (6/190)                  | 4.6 (11/237)                   |              |        |
| <b>Other Early Medical Complications</b>         |                                |                              |                                |              |        |
| Multiple birth                                   | 52.2 (118/387)                 | 23.8 (57/239)                | 20.6 (51/247)                  | 8.33         | 0.016  |
| Maternal Smoking in Pregnancy (# cigarettes/day) | 3.8 (7.4)                      | 3.5 (6.6)                    | 4.1 (6.6)                      | 0.30         | 0.738  |
| Maternal Drinking of Alcohol in Pregnancy        |                                |                              |                                | 12.92        | 0.012  |
| None                                             | 47.7 (157/329)                 | 60.9 (92/151)                | 52.9 (99/187)                  |              |        |
| <7 drinks/wk and < 3 drinks/occasion             | 49.5 (163/329)                 | 35.8 (54/151)                | 40.6 (76/187)                  |              |        |
| 7+ drinks/wk or 3+ drinks/occasion               | 2.7 (9/329)                    | 3.3 (6/196)                  | 6.4 (12/187)                   |              |        |

**Supplement Table 1 (continued): Background Characteristics of the Study Sample and two Comparison Samples<sup>a</sup>**

| Risk Factors                                                   | Comparison Samples           |                                |                          | $\chi^2 / F$ | P     |
|----------------------------------------------------------------|------------------------------|--------------------------------|--------------------------|--------------|-------|
|                                                                | Study Sample <sup>b</sup>    | Missing 1 or 2                 | Missing all 3            |              |       |
|                                                                |                              | DISC                           | DISC                     |              |       |
|                                                                |                              | Assessments <sup>c</sup>       | Assessments <sup>d</sup> |              |       |
| % (n/N)<br>M (SD)<br>(N = 387)                                 | % (n/N)<br>M (SD)<br>(N=190) | % (n/N)<br>M (SD)<br>(N = 237) |                          |              |       |
| Hypertension                                                   |                              |                                |                          | 7.54         | 0.274 |
| None                                                           | 70.8 (274/387)               | 71.1 (135/190)                 | 76.4 (181/237)           |              |       |
| Pre-hypertension                                               | 4.1 (16/387)                 | 4.2 (8/190)                    | 5.5 (13/237)             |              |       |
| PIH                                                            | 7.5 (29/387)                 | 10.5 (20/190)                  | 7.2 (17/237)             |              |       |
| Pre-eclampsia                                                  | 17.6 (68/387)                | 14.2 (27/190)                  | 11.0 (26/237)            |              |       |
| Placenta previa                                                | 2.7 (10/369)                 | 0.5 (1/183)                    | 1.8 (4/225)              | 3.06         | 0.216 |
| Placental Abruption                                            | 8.1 (30/369)                 | 5.5 (10/183)                   | 7.6 (17/225)             | 1.30         | 0.522 |
| Chorioamnionitis                                               | 3.3 (12/369)                 | 8.7 (16/183)                   | 4.0 (9/225)              | 8.54         | 0.014 |
| Active Labor                                                   | 58.7 (225/383)               | 62.2 (115/185)                 | 61.6 (141/229)           | 0.81         | 0.668 |
| Non-vertex presentation                                        | 33.4 (105/314)               | 26.8 (40/149)                  | 33.7 (63/187)            | 2.36         | 0.307 |
| 5-minute Apgar <=5                                             | 6.3 (24/379)                 | 5.6 (10/180)                   | 7.0 (16/229)             | 0.35         | 0.840 |
| Head circumference ratio <sup>f</sup>                          | 0.97 (0.07)                  | 0.96 (0.07)                    | 0.97 (0.07)              | 0.72         | 0.488 |
| Small head circumference <sup>g</sup>                          | 32.4 (124/383)               | 35.8 (68/190)                  | 33.9 (80/236)            | 0.64         | 0.714 |
| Base Excess (First Determination, mEq/L) <sup>h</sup>          | -4.6 (4.2)                   | -4.7 (3.9)                     | -4.5 (3.7)               | 0.96         | 0.909 |
| Seizure (First postpartum week)                                | 0.5 (2/387)                  | 2.1 (4/190)                    | 0.4 (1/237)              | 4.52         | 0.104 |
| Thyroxine Level (z-score)                                      | -1.5 (1.0)                   | -1.4 (1.1)                     | -1.5 (1.1)               | 0.50         | 0.604 |
| Cummulative hypocapnia (1st 8 days, mmHg x hours) <sup>h</sup> | 139.1 (241.4)                | 103.6 (153.8)                  | 138.9 (206.3)            | 1.60         | 0.204 |
| Cummulative hyperoxia (1st 8 days, mmHg x hours) <sup>h</sup>  | 1521.0 (1515.8)              | 1471.5 (1840.9)                | 1521.7 (1629.0)          | 0.55         | 0.947 |
| Systolic BP (# Days 2+ SD Below Mean, 1st week)                | 0.9 (1.6)                    | 0.5 (1.2)                      | 0.9 (1.6)                | 4.39         | 0.013 |
| Peak Bilirubin (1st 8 Days)                                    | 9.3 (2.7)                    | 9.0 (2.7)                      | 9.2 (2.4)                | 0.51         | 0.601 |
| Neonatal Infection (positive culture in blood, csf, or urine)  | 31.5 (122/387)               | 28.9 (55/190)                  | 24.1 (57/237)            | 4.01         | 0.134 |
| Prolonged Ventilation <sup>i</sup>                             | 11.6 (45/387)                | 8.4 (16/109)                   | 8.9 (21/237)             | 1.99         | 0.370 |

<sup>a</sup> Groups are mutually exclusive, cases with major cognitive and motor disabilities are removed.

<sup>b</sup> LBW/PT survivors assessed with the DISC at age 6, 9, and 16 years (N=387).

<sup>c</sup> LBW/PT survivors assessed with the DISC at age 6, 9, or 16 years -- but not all three ages (N=190).

<sup>d</sup> LBW/PT survivors to age 6 years who had not been adopted and were thus eligible for assessment at age 6, but who were not assessed with the DISC at this age (includes those assessed by phone, those lost to follow-up, and those refusing assessment at age 6 who were not assessed with the DISC at ages 9 and/or 16 -- N=237).

**Supplement Table 1 (continued): Background Characteristics of the Study Sample and two Comparison Samples<sup>a</sup>**

<sup>e</sup> One or more of 5 maternal risk conditions are present at the time of the infant's birth: age < 19 years, less than a high school education, unmarried status, minority status, or receiving public assistance.

<sup>f</sup> Birth Head Circumference relative to median expected for gestational age and gender (according to distributions of Yudkin<sup>1</sup>).

<sup>g</sup> Lowest 10<sup>th</sup> percent of distribution of gestational age and sex specific birth head circumference ratio distributions of Yudkin<sup>1</sup>.

<sup>h</sup> Available only for those with at least some time on a ventilator ( $n = 199$  for the Study Sample,  $n = 129$  for Incomplete DISC, and  $n = 123$  for the Other Eligible group).

<sup>i</sup> Excessive number of days on ventilator given gestational age.

**Supplement Table 2: Autism Spectrum Screen by Latent Class Using Higher Cutoffs for the SCQ and the ASSQ**

|                                                                                            | Most Likely Latent Class % (n/N) |              |              | Total % (n/N) | $\chi^2$ <sup>a</sup> | <i>P</i> <sup>b</sup> Value | Post-Hoc Analysis <i>P</i> Value |           |           |
|--------------------------------------------------------------------------------------------|----------------------------------|--------------|--------------|---------------|-----------------------|-----------------------------|----------------------------------|-----------|-----------|
|                                                                                            | PIA                              | SAL          | UA           |               |                       |                             | PIA vs SAL                       | SAL vs UA | PIA vs UA |
| <b>Autism Spectrum Disorders (screening status)</b>                                        |                                  |              |              |               |                       |                             |                                  |           |           |
| Screen positive for ASD <sup>c</sup><br>- Age 16 Years                                     | 15.2% (10/66)                    | 5.3% (6/150) | 0.6% (1/171) | 4.9% (19/387) | 21.74                 | <0.001                      | 0.029                            | 0.014     | <0.001    |
| Social Communication<br>Questionnaire (SCQ) $\geq 14$ <sup>d</sup><br>- Age 16 Years       | 6.1% (4/66)                      | 3.3% (5/150) | 0.0% (0/171) | 2.3% (9/387)  | 8.80                  | 0.013                       | 0.461                            | 0.021     | 0.006     |
| Autism Spectrum Screening<br>Questionnaire (ASSQ) $\geq 19$ <sup>e</sup><br>- Age 16 Years | 7.6% (5/66)                      | 0.7% (1/150) | 0.0% (0/171) | 1.6% (6/387)  | 19.159                | <0.001                      | 0.011                            | 0.467     | 0.001     |
| Professional diagnosis of ASD<br>.- (ever by age 16 years)                                 | 6.7% (4/60)                      | 1.4% (2/143) | 0.6% (1/166) | 1.9% (7/369)  | 9.020                 | 0.011                       | 0.064                            | 0.598     | 0.018     |

PIA = Persistent Inattentive; SAL=School Age Limited; UA=Unaffected.

<sup>a</sup> Two degrees of freedom.

<sup>b</sup> *P* values are exact 2-sided.

<sup>c</sup> Above cutpoint on the SCQ or ASSQ or given an ASD diagnosis by a professional.

<sup>d</sup> Johnson et al. (2011).

<sup>e</sup> Ehlers et al. (1999).

**Supplement Table 3: Current (past 6 months at ages 6 and 9 years, past year at age 16) Prevalence of DSM Psychiatric Disorders in Study Sample (n=387)**

|                                  | Age 6 <sup>a</sup> | Age 9 <sup>b</sup> | Age 16 <sup>c</sup> |                             |
|----------------------------------|--------------------|--------------------|---------------------|-----------------------------|
|                                  |                    |                    | Threshold           | Threshold plus Subthreshold |
| Any ADHD                         | 13.7%              | 6.5%               | 5.4%                | 18.6%                       |
| Inattentive ADHD                 | ne                 | 3.4%               | 3.9%                | 15.2%                       |
| Hyperactive ADHD                 | ne                 | 3.1%               | 0.0%                | 0.3%                        |
| Combined ADHD                    | ne                 | 5.9%               | 1.6%                | 3.1%                        |
| Any disruptive disorder          | 6.5%               | 6.2%               | 8.8%                | 28.2%                       |
| ODD                              | 5.9%               | 4.9%               | 8.5%                | 27.1%                       |
| CD                               | 1.0%               | 1.6%               | 1.0%                | 3.1%                        |
| Any anxiety disorder w-o OCD     | 4.4%               | ne                 | 9.3%                | 16.0%                       |
| Overanxious/generalized anxiety  | 1.3%               | ne                 | 0.5%                | 2.6%                        |
| Separation anxiety               | 3.4%               | ne                 | 1.0%                | 2.3%                        |
| Avoidant disorder                | 0.3%               | ne                 | ne                  | ne                          |
| Social phobia                    | ne                 | ne                 | 2.6%                | 5.9%                        |
| Simple/specific phobia           | 0.5%               | ne                 | 5.2%                | 6.5%                        |
| PTSD                             | ne                 | ne                 | 0.3%                | 1.0%                        |
| Panic disorder                   | ne                 | ne                 | 0.3%                | 1.8%                        |
| Agoraphobia                      | ne                 | ne                 | 0.0%                | 0.0%                        |
| Selective/elective mutism        | 0.5%               | ne                 | 0.3%                | 0.5%                        |
| Any Mood disorder                | ne                 | ne                 | 1.8%                | 5.7%                        |
| Major depression                 | 0.3%               | ne                 | 1.0%                | 4.7%                        |
| Dysthymia                        | ne                 | ne                 | 0.5%                | 2.3%                        |
| Mania                            | ne                 | ne                 | 0.3%                | 1.0%                        |
| Any tic disorder                 | 1.3%               | ne                 | 3.1%                | 5.2%                        |
| OCD                              | 6.5%               | ne                 | 0.3%                | 3.4%                        |
| Schizophrenia                    | ne                 | ne                 | 0.0%                | 0.3%                        |
| Pica                             | 0.5%               | ne                 | 0.0%                | 0.0%                        |
| Any eating disorder              | ne                 | ne                 | 0.0%                | 1.6%                        |
| Any elimination disorder         | 7.0%               | ne                 | 0.3%                | 1.0%                        |
| Nocturnal enuresis               | 6.2%               | ne                 | 0.3%                | 1.0%                        |
| Diurnal enuresis                 | 0.8%               | ne                 | 0.0%                | 0.0%                        |
| Encopresis                       | 0.8%               | ne                 | 0.0%                | 0.0%                        |
| Any substance abuse/dependence   | ne                 | ne                 | 1.3%                | 1.8%                        |
| Alcohol abuse/dependence         | ne                 | ne                 | 0.5%                | 0.8%                        |
| Marijuana abuse/dependence       | ne                 | ne                 | 0.8%                | 0.8%                        |
| Nicotine abuse/dependence        | ne                 | ne                 | 0.3%                | 0.5%                        |
| Other substance abuse/dependence | ne                 | ne                 | 0.3%                | 0.3%                        |
| Any disorder                     | 19.6               | ne                 | 22.5%               | 47.3%                       |

<sup>a</sup>DSMIII-R (DISC 2.1) ;

<sup>b</sup>DSM-IV (DISC 3.0);

<sup>c</sup>DSM-IV (DISC 4.0)

Note<sub>1</sub> – “ne” indicates “not evaluated.”

Note<sub>2</sub> – Shaded cells indicate prevalence ≥ 3% for a specific disorder ; at age 16, only the threshold version of the variable is highlighted if ≥ 3%, or If threshold version is < 3% but threshold+subthreshold version is ≥ 3%, this latter version is highlighted

Supplement Table 4. Functional Outcomes at Age 16 Controlling for IQ, Motor Problems, Social Communication Difficulties<sup>a</sup>, and Presence of any Class-related DSM-IV Psychiatric Diagnosis

| Outcome                                                        | Adjusting for...                                                                 | Adjusted Percentage |      |      |                |        |
|----------------------------------------------------------------|----------------------------------------------------------------------------------|---------------------|------|------|----------------|--------|
|                                                                |                                                                                  | PIA                 | SAL  | UA   | X <sup>2</sup> | P      |
| <b>Psychosocial Impairment</b>                                 |                                                                                  | %                   | %    | %    |                |        |
| Columbia Impairment Scale (CIS) ≥ 16 <sup>B</sup>              | <i>Unadjusted</i>                                                                | 100                 | 76.6 | 62.0 | 18.73          | <0.001 |
|                                                                | Riley Motor Problems Inventory (RMPI)<br>Percent Scoring in the top 2% for Age 6 | 100                 | 76.9 | 62.4 | 17.74          | <0.001 |
|                                                                | Social Communication Difficulties                                                | 100                 | 76.6 | 62.4 | 17.68          | <0.001 |
|                                                                | Presence of a Non-ADHD DSM-IV dx                                                 | 100                 | 76.5 | 63.4 | 15.19          | 0.001  |
|                                                                | All Three Covariates                                                             | 100                 | 76.6 | 63.8 | 13.93          | 0.001  |
| Children's Global Assessment Scale (CGAS) ≤ 70                 | <i>Unadjusted</i>                                                                | 70.3                | 36.4 | 8.2  | 63.52          | <0.001 |
|                                                                | Full Scale IQ < 70                                                               | 67.7                | 34.2 | 8.3  | 57.09          | <0.001 |
|                                                                | Riley Motor Problems Inventory (RMPI)<br>Percent Scoring in the top 2% for Age 6 | 67.6                | 36.6 | 8.9  | 53.70          | <0.001 |
|                                                                | Social Communication Difficulties                                                | 68.3                | 36.5 | 8.9  | 56.42          | <0.001 |
|                                                                | Presence of a Non-ADHD DSM-IV dx                                                 | 66.8                | 36.1 | 8.8  | 47.86          | <0.001 |
|                                                                | All Four Covariates                                                              | 63.2                | 35.6 | 4.6  | 35.53          | <0.001 |
| <b>Adaptive Functioning: Vineland Adaptive Behavior Scales</b> |                                                                                  |                     |      |      |                |        |
| Communication Standard Score < 80                              | <i>Unadjusted</i>                                                                | 43.7                | 29.8 | 13.6 | 23.50          | <0.001 |
|                                                                | Full Scale IQ < 70                                                               | 41.7                | 29.2 | 15.0 | 17.59          | <0.001 |
|                                                                | Riley Motor Problems Inventory (RMPI)<br>Percent Scoring in the top 2% for Age 6 | 41.6                | 29.9 | 14.3 | 18.71          | <0.001 |
|                                                                | Social Communication Difficulties                                                | 41.2                | 30.2 | 14.3 | 17.51          | <0.001 |
|                                                                | Presence of a Non-ADHD DSM-IV dx                                                 | 42.1                | 29.7 | 14.3 | 19.10          | <0.001 |
|                                                                | All Four Covariates                                                              | 38.3                | 29.6 | 15.8 | 11.30          | 0.001  |

Supplement Table 4 (continued). Functional Outcomes at Age 16 Controlling for IQ, Motor Problems, Social Communication Difficulties<sup>a</sup>, and Presence of any Non-ADHD Class-related DSM-IV Psychiatric Diagnosis

| Outcome                                               | Adjusting for...                                                                 | Adjusted Percentage |      |      |                |        |
|-------------------------------------------------------|----------------------------------------------------------------------------------|---------------------|------|------|----------------|--------|
|                                                       |                                                                                  | PIA                 | SAL  | UA   | X <sup>2</sup> | P      |
| Daily Living<br>Standard Score < 80                   | <i>Unadjusted</i>                                                                | 41.6                | 20.7 | 20.0 | 12.29          | 0.001  |
|                                                       | Full Scale IQ < 70                                                               | 37.8                | 20.5 | 20.3 | 10.95          | 0.004  |
|                                                       | Riley Motor Problems Inventory (RMPI)<br>Percent Scoring in the top 2% for Age 6 | 38.4                | 20.4 | 20.1 | 11.50          | 0.003  |
|                                                       | Social Communication Difficulties                                                | 38.3                | 20.5 | 20.8 | 8.37           | 0.015  |
|                                                       | Presence of a Non-ADHD DSM-IV dx                                                 | 39.6                | 20.7 | 14.5 | 13.02          | 0.001  |
|                                                       | All Four Covariates                                                              | 38.0                | 20.4 | 20.3 | 9.61           | 0.008  |
| Socialization<br>Standard Score < 80                  | <i>Unadjusted</i>                                                                | 25.5                | 13.2 | 0.5  | 29.96          | <0.001 |
|                                                       | Full Scale IQ < 70                                                               | 24.9                | 13.0 | 1.1  | 25.46          | <0.001 |
|                                                       | Riley Motor Problems Inventory (RMPI)<br>Percent Scoring in the top 2% for Age 6 | 24.5                | 13.4 | 0.9  | 24.05          | <0.001 |
|                                                       | Social Communication Difficulties                                                | 24.1                | 13.0 | 1.3  | 22.05          | <0.001 |
|                                                       | # of DSM-IV dxs                                                                  | 23.8                | 12.8 | 1.5  | 21.20          | <0.001 |
|                                                       | All Four Covariates                                                              | 22.0                | 12.7 | 2.4  | 14.75          | 0.001  |
| Adaptive Behavior<br>Composite Standard Score<br>< 80 | <i>Unadjusted</i>                                                                | 43.1                | 23.5 | 10.7 | 31.55          | <0.001 |
|                                                       | Full Scale IQ < 70                                                               | 41.7                | 22.8 | 11.9 | 25.62          | <0.001 |
|                                                       | Riley Motor Problems Inventory (RMPI)<br>Percent Scoring in the top 2% for Age 6 | 41.1                | 23.5 | 11.4 | 24.74          | <0.001 |
|                                                       | Social Communication Difficulties                                                | 41.3                | 23.7 | 11.3 | 23.70          | <0.001 |
|                                                       | Presence of a Non-ADHD DSM-IV dx                                                 | 41.5                | 23.3 | 11.5 | 25.47          | <0.001 |
|                                                       | All Four Covariates                                                              | 38.7                | 23.2 | 12.7 | 15.96          | <0.001 |



Supplement Table 4 (continued). Functional Outcomes at Age 16 Controlling for IQ, Motor Problems, Social Communication Difficulties<sup>a</sup>, and Presence of any Non-ADHD Class-related DSM-IV Psychiatric Diagnosis

| Outcome                                              | Adjusting for...                                                              | Adjusted Percentage |               |               |                 |        |
|------------------------------------------------------|-------------------------------------------------------------------------------|---------------------|---------------|---------------|-----------------|--------|
|                                                      |                                                                               | PIA                 | SAL           | UA            | X <sup>2</sup>  | P      |
| <b>Self-Reported Well-Being</b>                      |                                                                               |                     |               |               |                 |        |
| Beck Score ≥ 16 (depressed)                          | <i>Unadjusted</i>                                                             | 12.0                | 5.3           | 3.7           | 5.57            | 0.062  |
|                                                      | Full Scale IQ < 70                                                            | 12.0                | 5.7           | 3.7           | 5.22            | 0.024  |
|                                                      | Riley Motor Problems Inventory (RMPI) Percent Scoring in the top 2% for Age 6 | 9.8                 | 5.4           | 3.8           | 3.96            | 0.138  |
|                                                      | Social Communication Difficulties                                             | 10.0                | 5.3           | 3.8           | 4.63            | 0.099  |
|                                                      | Presence of a Non-ADHD DSM-IV dx                                              | 8.9                 | 5.1           | 4.5           | 2.30            | 0.317  |
|                                                      | All Four Covariates                                                           | 8.5                 | 5.1           | 4.6           | 1.55            | 0.461  |
| Victim of Bullying Scale (Mean ± Standard Error) (n) | <i>Unadjusted</i>                                                             | .68±.10 (56)        | .29±.04 (137) | .19±.03 (163) | F(2,353)= 21.43 | <0.001 |
|                                                      | Full Scale IQ < 70                                                            | .66±.065 (56)       | .29±.04 (137) | .20±.04 (163) | F(2,352)= 18.54 | <0.001 |
|                                                      | Riley Motor Problems Inventory (RMPI) Percent Scoring in the top 2% for Age 6 | .65±.07 (54)        | .29±.04 (136) | .20±.04 (161) | F(2,347)= 16.77 | <0.001 |
|                                                      | Social Communication Difficulties                                             | .67±.07 (56)        | .29±.04 (137) | .20±.04 (163) | F(2,352)= 19.16 | 0.001  |
|                                                      | Presence of a Non-ADHD DSM-IV dx                                              | .66±.07 (56)        | .29±.04 (137) | .20±.04 (163) | F(2,352)= 17.93 | <0.001 |
|                                                      | All Four Covariates                                                           | .62±.07 (54)        | .29±.04 (136) | .21±.04 (161) | F(2,344)= 13.31 | <0.001 |

<sup>a</sup> As indicated by a positive screen for ASD.

<sup>b</sup> For this outcome, no adjustment was made for IQ because all of the low IQ subjects had CIS scores >= 16.

**Supplement Table 5: Relative Odds of Medication for ADHD in the Persistent Inattentive Class (PIA) versus Other Groups at ages 6, 9, and 16.**

|               | <b>Unadjusted<br/>OR (95% CI)</b> | <b>Adjusted for Impairment<br/>OR (95% CI)</b> |
|---------------|-----------------------------------|------------------------------------------------|
| <b>Age 6</b>  | <b>13.1 (2.48, 68.9)</b>          | <b>3.89 (0.63, 23.8)</b>                       |
| <b>Age 9</b>  | <b>42.9 (12.2, 150)</b>           | <b>14.7 (3.08, 71.8)</b>                       |
| <b>Age 16</b> | <b>17.2 (7.87, 37.5)</b>          | <b>9.36 (3.34, 26.2)</b>                       |

The heightened probability of impairment in the PIA class accounts for much of the enhanced likelihood of ADHD medication in this group. However, at ages 9 and 16 in particular, manifold elevations in the odds of being on ADHD medication remain after adjustment for inattention-related and hyperactivity/impulsivity-related impairment. This suggests that characteristics of the PIA other than parent-reported impairment are apparent to clinicians and lead them to prescribe medications.

**Supplement Table 6: DSM-Symptom-Based ADHD Diagnoses at Ages 6, 9 and 16 Years by Most Likely Latent Class**

|                                       | Most Likely Latent Class     |                          |                 |
|---------------------------------------|------------------------------|--------------------------|-----------------|
|                                       | Persistent Inattentive (PIA) | School Age Limited (SAL) | Unaffected (UA) |
| <b>Age 6 DSM III-R ADHD Diagnosis</b> | % (n/N)                      | % (n/N)                  | % (n/N)         |
| Any ADHD                              | 60.6% (40/66)                | 16.0% (24/150)           | 0.6% (1/171)    |
| <b>Age 9 DSM IV ADHD Diagnoses</b>    | % (n/N)                      | % (n/N)                  | % (n/N)         |
| Combined                              | 43.9% (29/66)                | 0.7% (1/150)             | 0.0% (0/171)    |
| Predominantly Inattentive             | 30.3% (20/66)                | 17.3% (26/150)           | 0.6% (1/171)    |
| Predominantly Hyperactive-Impulsive   | 18.2% (12/66)                | 8.0% (12/150)            | 0.0% (0/171)    |
| Subthreshold (NOS) <sup>c</sup>       | 6.1% (4/66)                  | 33.3% (50/150)           | 1.8% (3/171)    |
| No ADHD diagnosis                     | 1.5 % (1/66)                 | 40.7% (61/150)           | 97.7% (167/171) |
| <b>Age 16 DSM IV ADHD Diagnoses</b>   | % (n/N)                      | % (n/N)                  | % (n/N)         |
| Combined                              | 10.6% (7/66)                 | 0.0% (0/150)             | 0.0% (0/171)    |
| Predominantly Inattentive             | 45.5% (30/66)                | 4.7% (7/150)             | 0.0% (0/171)    |
| Predominantly Hyperactive-Impulsive   | 3.0% (2/66)                  | 1.3% (2/150)             | 0.0% (0/171)    |
| Subthreshold (NOS) <sup>a</sup>       | 15.2% (10/66)                | 6.0% (9/150)             | 0.0% (0/171)    |
| No DSM-IV ADHD                        | 25.8% (17/66)                | 88.0% (132/150)          | 100% (171/171)  |

<sup>a</sup>Subthreshold (Not otherwise specified): Individuals with between 6 and 10 ADHD symptoms but with less than six in each subtype

**Supplement Table 7: Age 16 Functional Outcomes: Distribution by Age 9 DSM-IV ADHD Subtypes  
(Combined versus Predominantly Inattentive)**

|                                                          |               | Symptom-Defined<br>Age 9 ADHD Subtype |                              |                    | $X^2_{(2)}/$<br>$F(2,473)$ | <i>P</i> |
|----------------------------------------------------------|---------------|---------------------------------------|------------------------------|--------------------|----------------------------|----------|
|                                                          |               | Combined                              | Predominantly<br>Inattentive | Total              |                            |          |
| <b>Education</b>                                         |               |                                       |                              |                    |                            |          |
| Any special education services?                          | % (n)         | 82.6 (19/23)                          | 54.2 (26/48)                 | 63.4 (45/71)       | 5.42                       | .034     |
| Below Expected Grade?                                    | % (n)         | 26.3 (5/19)                           | 21.7 (10/46)                 | 23.1 (15/65)       | .159                       | .751     |
| <b>Psychosocial Impairment</b>                           |               |                                       |                              |                    |                            |          |
| Columbia Impairment Scale<br>(CIS) $\geq 16$             | % (n)         | 100.0 (23/23)                         | 88.9 (40/45)                 | 92.6 (63/68)       | 2.758                      | .159     |
| Columbia Global Assessment Scale (CGAS) $\leq 70$        | % (n)         | 69.6 (16/23)                          | 55.3 (26/47)                 | 60.0 (42/70)       | 1.30                       | .306     |
| <b>Adaptive Functioning</b>                              |               |                                       |                              |                    |                            |          |
| Vineland Adaptive Behavior Scales Standard<br>score < 80 |               |                                       |                              |                    |                            |          |
| Communication                                            | % (n)         | 52.4 (11/21)                          | 43.8 (21/48)                 | 46.4 (32/69)       | .44                        | .603     |
| Daily Living                                             | % (n)         | 47.6 (10/21)                          | 41.7 (20/58)                 | 43.5 (30/69)       | .211                       | .793     |
| Socialization                                            | % (n)         | 33.3 (7/21)                           | 22.9 (11/48)                 | 26.1 (18/69)       | 3.71                       | .068     |
| Adaptive Behavior Composite                              | % (n)         | 52.4 (11/21)                          | 43.8 (21/48)                 | 46.4 (32/69)       | .44                        | .603     |
| <b>Self-Reported Well Being</b>                          |               |                                       |                              |                    |                            |          |
| Beck Score $\geq 16$ (Depressed)                         | % (n)         | 16.7 (3/18)                           | 6.5 (3/46)                   | 9.4 (6/64)         | 1.57                       | .338     |
| Suicidality (Beck item 9)                                | % (n)         | 16.7 (3/18)                           | 13.0 (6/46)                  | 14.1 (9/64)        | .14                        | 1.00     |
| Ribgy-Slee Victim of Bullying Scale                      | M $\pm$ S (n) | .62 $\pm$ .67 (19)                    | .48 $\pm$ .58 (43)           | .52 $\pm$ .61 (62) | .705                       | .405     |

**Supplement Table 8: Other Clinical Characteristics: Distribution by Age 9 DSM-IV ADHD Subtypes (Combined versus Predominantly Inattentive)**

|                                                                                                               |             |         | Symptom-Defined<br>Age 9 ADHD Subtype |                              |              | Total | $\chi^2_{(2)}$ | P <sup>a</sup> |
|---------------------------------------------------------------------------------------------------------------|-------------|---------|---------------------------------------|------------------------------|--------------|-------|----------------|----------------|
|                                                                                                               |             |         | Combined                              | Predominantly<br>Inattentive |              |       |                |                |
| <b>Neurodevelopmental Features</b>                                                                            |             |         |                                       |                              |              |       |                |                |
| Riley Motor Problems Inventory<br>Total Score in top 2% (at age 6)                                            |             |         |                                       |                              |              |       |                |                |
|                                                                                                               | at Age 6    | % (n/N) | 56.5 (13/23)                          | 41.7 (20/48)                 | 46.5 (33/71) | 1.379 | 0.311          |                |
|                                                                                                               | at Age 9    | % (n/N) | 69.6 (16/23)                          | 56.3 (27/48)                 | 60.6 (43/71) | 1.154 | 0.313          |                |
|                                                                                                               | at Age 16   | % (n/N) | 18.2 (4/22)                           | 14.9 (7/47)                  | 15.9 (11/69) | 0.121 | 1.000          |                |
| IQ > 2 SD below Mean at 3 ages                                                                                |             |         |                                       |                              |              |       |                |                |
| Stanford-Binet                                                                                                | at Age 6    | % (n/N) | 0 (0/23)                              | 0.0 (0/48)                   | 0.0 (0/71)   |       |                |                |
| WISC-III                                                                                                      | at Age 9    | % (n/N) | 4.5 (1/22)                            | 4.3 (2/47)                   | 4.3 (3/69)   | 0.003 | 1.000          |                |
| WASI                                                                                                          | at Age 16   | % (n/N) | 8.7 (2/23)                            | 6.3 (3/48)                   | 7.0 (5/71)   | 0.142 | 1.000          |                |
| Screen + for ASD <sup>b</sup> at age 16                                                                       |             | % (n/N) | 34.8 (8/23)                           | 27.1 (13/48)                 | 29.6 (21/71) | 0.443 | 0.582          |                |
| SCQ ≥ 9                                                                                                       | at Age 16   | % (n/N) | 31.6 (6/19)                           | 22.2 (10/45)                 | 25.0 (16/64) | 0.624 | 0.530          |                |
| ASSQ ≥ 12                                                                                                     | at Age 16   | % (n/N) | 23.8 (5/21)                           | 6.7 (3/45)                   | 12.1 (8/66)  | 3.950 | 0.098          |                |
| Diagnosis of ASD                                                                                              | (by Age 16) | % (n/N) | 15.8 (3/19)                           | 2.1 (1/47)                   | 6.1 (4/66)   | 4.436 | 0.069          |                |
| <b>DSM Psychiatric Disorders Assessed with the Diagnostic Interview Schedule for Children- Parent Version</b> |             |         |                                       |                              |              |       |                |                |
| Oppositional Defiant                                                                                          | at Age 6    | % (n/N) | 26.1 (6/23)                           | 10.4 (5/48)                  | 15.5 (11/71) | 2.916 | 0.157          |                |
|                                                                                                               | at Age 9    | % (n/N) | 17.4 (4/23)                           | 12.5 (6/48)                  | 14.1 (10/71) | 0.307 | 0.718          |                |
|                                                                                                               | at Age 16   | % (n/N) | 39.1 (9/23)                           | 14.6 (7/48)                  | 22.5 (16/71) | 5.367 | 0.033          |                |
| Conduct                                                                                                       | at Age 6    | % (n/N) | 4.5 (1/22)                            | 2.1 (1/48)                   | 2.9 (2/70)   | 0.329 | 1.000          |                |
|                                                                                                               | at Age 9    | % (n/N) | 13.0 (3/23)                           | 0.0 (0/48)                   | 4.2 (3/71)   | 6.537 | 0.031          |                |
|                                                                                                               | at Age 16   | % (n/N) | 8.7 (2/23)                            | 2.1 (1/48)                   | 4.2 (3/71)   | 1.680 | 0.243          |                |
| Separation Anxiety                                                                                            | at Age 6    | % (n/N) | 4.3 (1/23)                            | 4.2 (2/48)                   | 4.2 (3/71)   | 0.001 | 1.000          |                |
|                                                                                                               | at Age 16   | % (n/N) | 13.0 (3/23)                           | 4.2 (2/48)                   | 7.0 (5/71)   | 1.872 | 0.320          |                |
| Social Phobia                                                                                                 | at Age 6    | % (n/N) | ne                                    | ne                           | ne           | ne    | ne             |                |
|                                                                                                               | at Age 16   | % (n/N) | 21.7 (5/23)                           | 8.3 (4/48)                   | 12.7 (9/71)  | 2.525 | 0.138          |                |

**Supplement Table 8 (continued): Other Clinical Characteristics: Distribution by Age 9 DSM-IV ADHD Subtypes (Combined versus Predominantly Inattentive)**

|                                   |           |         | Symptom-Defined<br>Age 9 ADHD Subtype |                              |              | Total  | $\chi^2_{(2)}$ | P <sup>a</sup> |
|-----------------------------------|-----------|---------|---------------------------------------|------------------------------|--------------|--------|----------------|----------------|
|                                   |           |         | Combined                              | Predominantly<br>Inattentive |              |        |                |                |
| Simple Phobia                     | at Age 6  | % (n/N) | 0.0 (0/23)                            | 0.0 (0/48)                   | 0.0 (0/71)   | _____  | _____          |                |
|                                   | at Age 16 | % (n/N) | 4.3 (1/23)                            | 4.2 (2/48)                   | 4.2 (3/71)   | 0.001  | 1.000          |                |
| Major Depression                  | at Age 6  | % (n/N) | 0.0 (0/23)                            | 0.0 (0/48)                   | 0.0 (0/71)   | _____  | _____          |                |
|                                   | at Age 16 | % (n/N) | 17.4 (4/23)                           | 8.3 (4/48)                   | 11.3 (8/71)  | 1.276  | 0.423          |                |
| Any Tic                           | at Age 6  | % (n/N) | 8.7 (2/23)                            | 4.2 (2/48)                   | 5.6 (4/71)   | 0.600  | 0.591          |                |
|                                   | at Age 16 | % (n/N) | 8.7 (2/23)                            | 2.1 (1/48)                   | 4.2 (3/71)   | 1.680  | 0.243          |                |
| Obsessive-Compulsive              | at Age 6  | % (n/N) | 8.7 (2/23)                            | 12.5 (6/48)                  | 11.3 (8/71)  | 0.225  | 0.715          |                |
|                                   | at Age 16 | % (n/N) | 17.4 (4/23)                           | 4.2 (2/48)                   | 8.5 (6/71)   | 3.515  | 0.082          |                |
| Nocturnal enuresis                | at Age 6  | % (n/N) | 26.1 (6/23)                           | 10.4 (5/48)                  | 15.5 (11/71) | 2.916  | 0.157          |                |
|                                   | at Age 16 | % (n/N) | 0.0 (0/23)                            | 0.0 (0/48)                   | 0.0 (0/71)   | _____  | _____          |                |
| <b>Taking Medication for ADHD</b> |           |         |                                       |                              |              |        |                |                |
|                                   | at Age 6  | % (n/N) | 8.7 (2/23)                            | 6.3 (3/48)                   | 7.0 (5/71)   | .142   | 1.000          |                |
|                                   | at Age 9  | % (n/N) | 39.1 (9/23)                           | 10.4 (5/48)                  | 19.7 (14/71) | 8.099  | 0.009          |                |
|                                   | at Age 16 | % (n/N) | 60.9 (14/23)                          | 18.8 (9/48)                  | 32.4 (23/71) | 12.596 | 0.001          |                |

<sup>a</sup>Exact 2-sided p-value.

<sup>b</sup>Defined as satisfying any one of 3 conditions: (1) a score  $\geq 9$  on the SCQ; (2) a score of  $\geq 12$  on the ASSQ, or (3) a history of professional diagnosis of ASD.

Note: ne = not evaluated

## Reference List

1. Yudkin PL, Aboualfa M, Eyre JA, Redman CW, Wilkinson AR. New birthweight and head circumference centiles for gestational ages 24 to 42 weeks. *Early Hum Dev.* Jan 1987;15(1):45-52.
